# Supplementary material for: Metastasis Initiation Precedes Detection of Primary Cancer—Analysis of Metastasis Growth in vivo in a Colorectal Cancer Test Case
Source: Front Physiol. 2020 Dec 17;11:533101. doi: 10.3389/fphys.2020.533101 (PMC7773782; doi:10.3389/fphys.2020.533101)
Supplement: Supplementary file 2 [file Data_Sheet_2.docx]

***Sensitivity Analysis Figures***


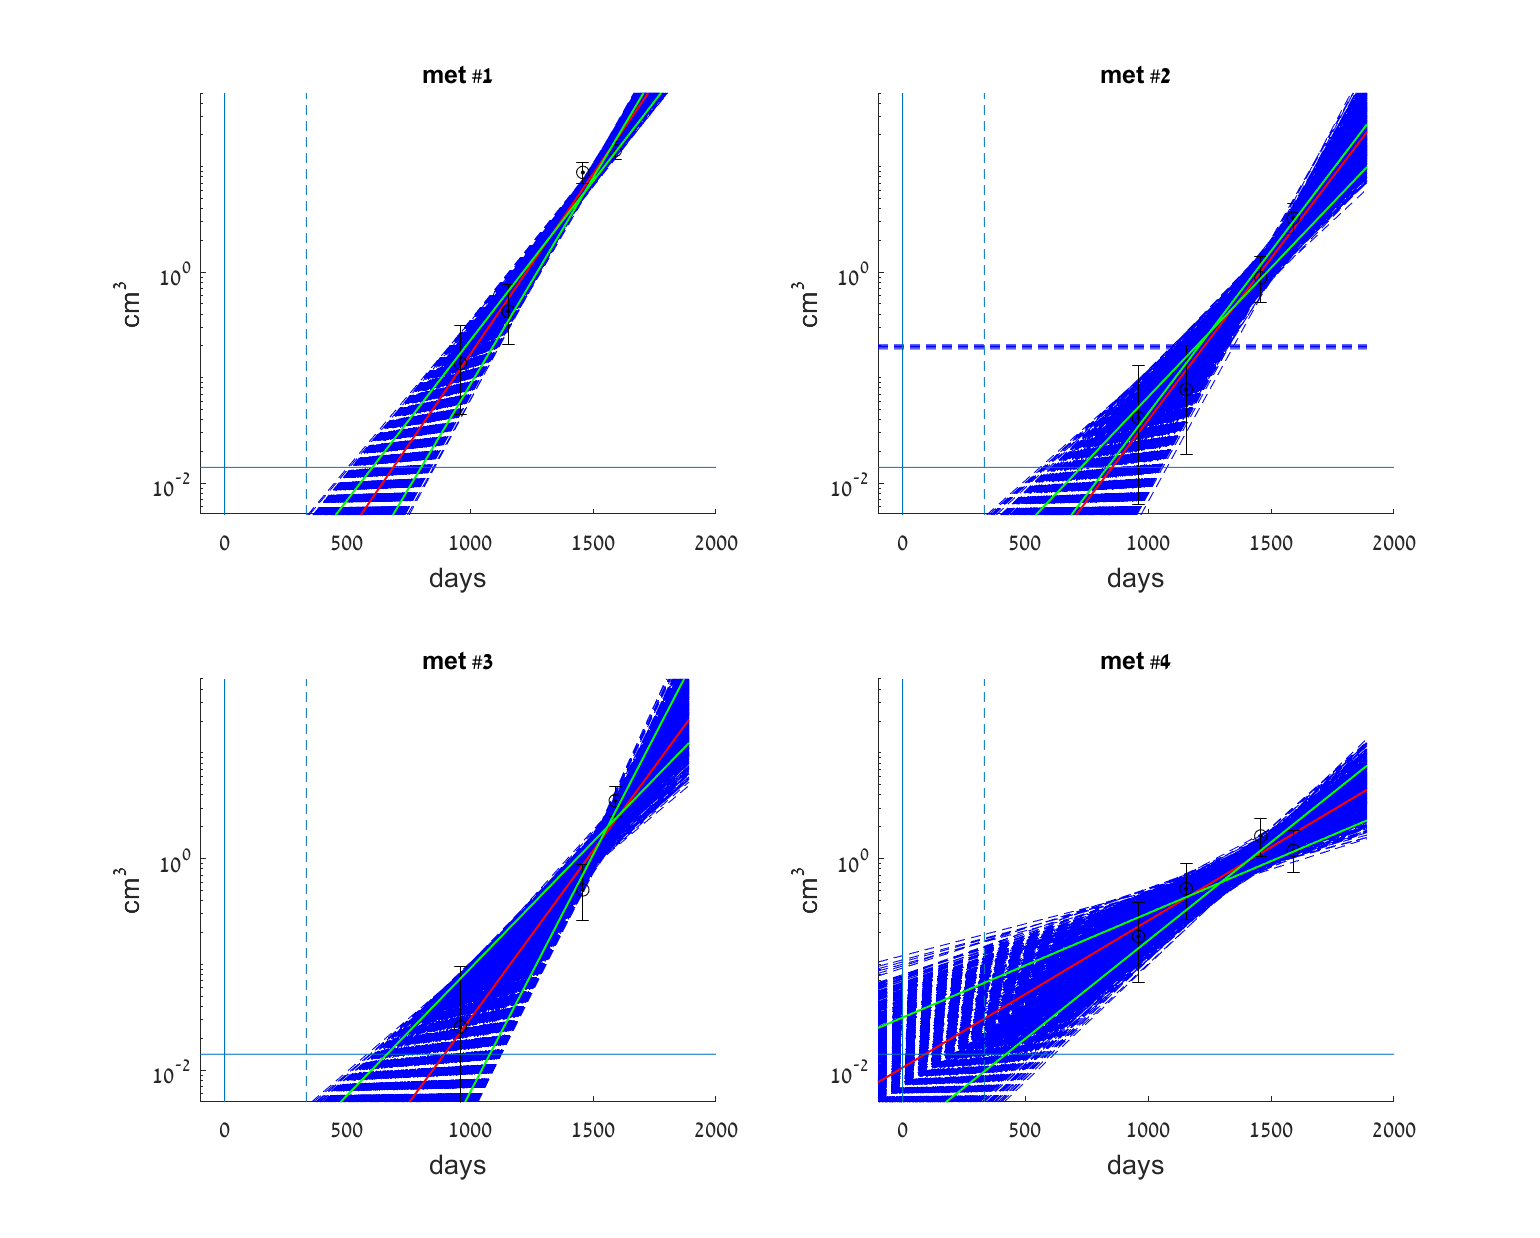


***Figure S1: Exponential model - Sensitivity analysis of the fit. Blue dashed lines: exponential models, fitted to a 1000 random different measurement samples within the measured data error bars. Black circles: Clinical data measurements with measurement error bars. Red curve: The model fitted to the reported measurement data. Green curves: interdecile range (fitted models with 10% and 90% of the sorted values).***

***
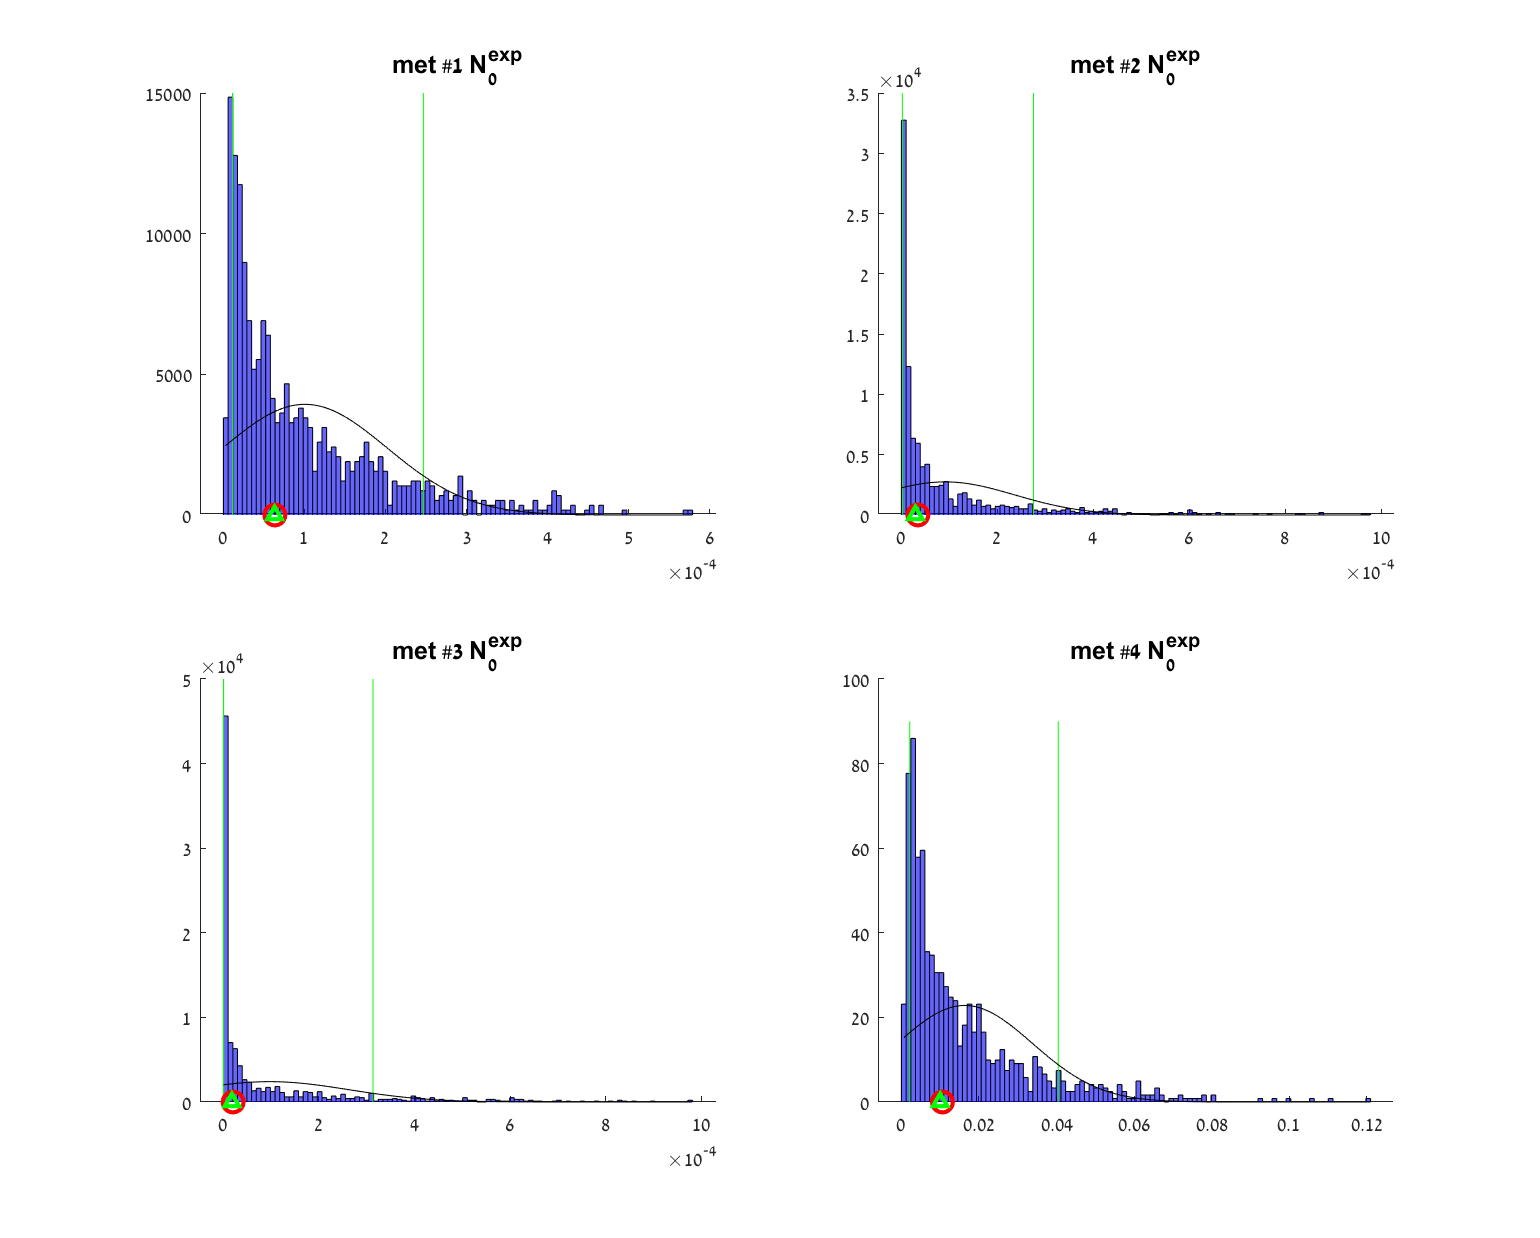
***

***Figure S2: Exponential model - Sensitivity analysis of the fit. Blue bars: A histogram of parameter values, fitted to a 1000 random measurement samples within the measured data error bars. Black curve: A PDF plot assuming normal distribution of the values. Green triangle: Median value. Green vertical lines: interdecile range (10% and 90% of the sorted values). Red circle: The value fitted to the reported measured data.***

***
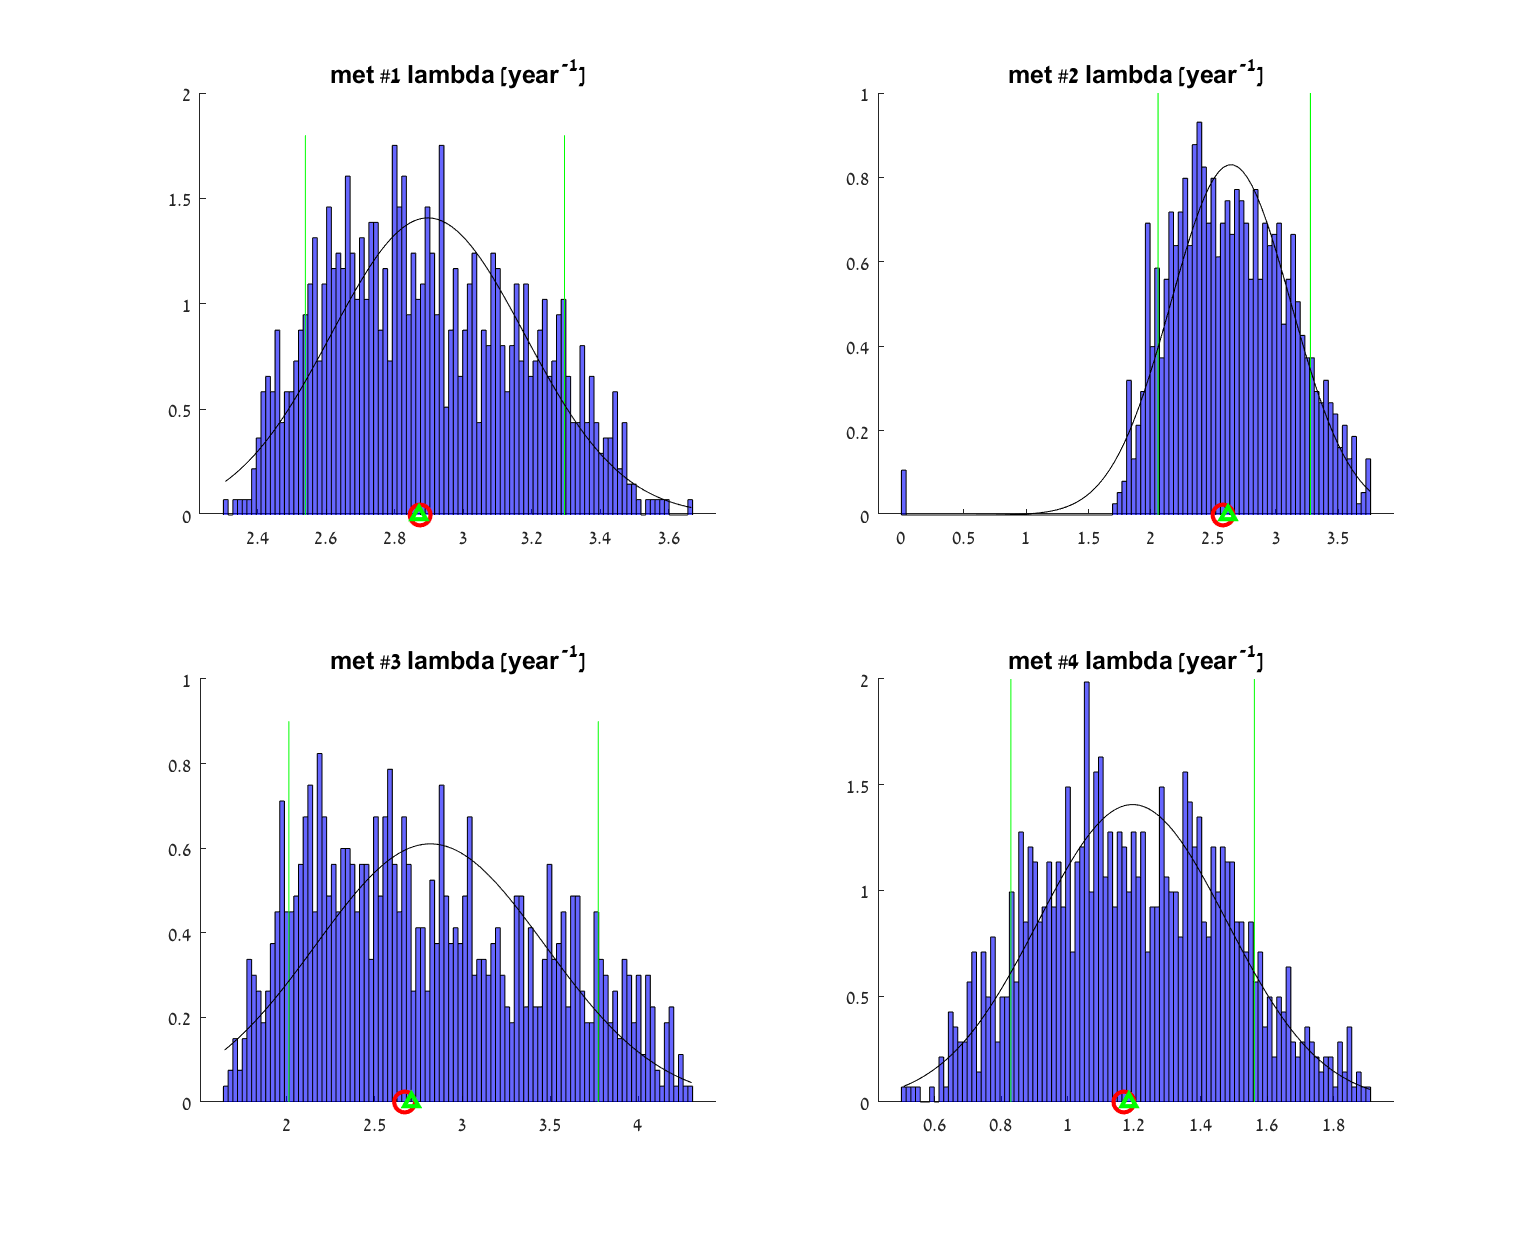
***

***Figure S3: Exponential model - Sensitivity analysis of the fit. Blue bars: A histogram of parameter values, fitted to a 1000 random measurement samples within the measured data error bars. Black curve: A PDF plot assuming normal distribution of the values. Green triangle: Median value. Green vertical lines: interdecile range (10% and 90% of the sorted values). Red circle: The value fitted to the reported measured data.***

***
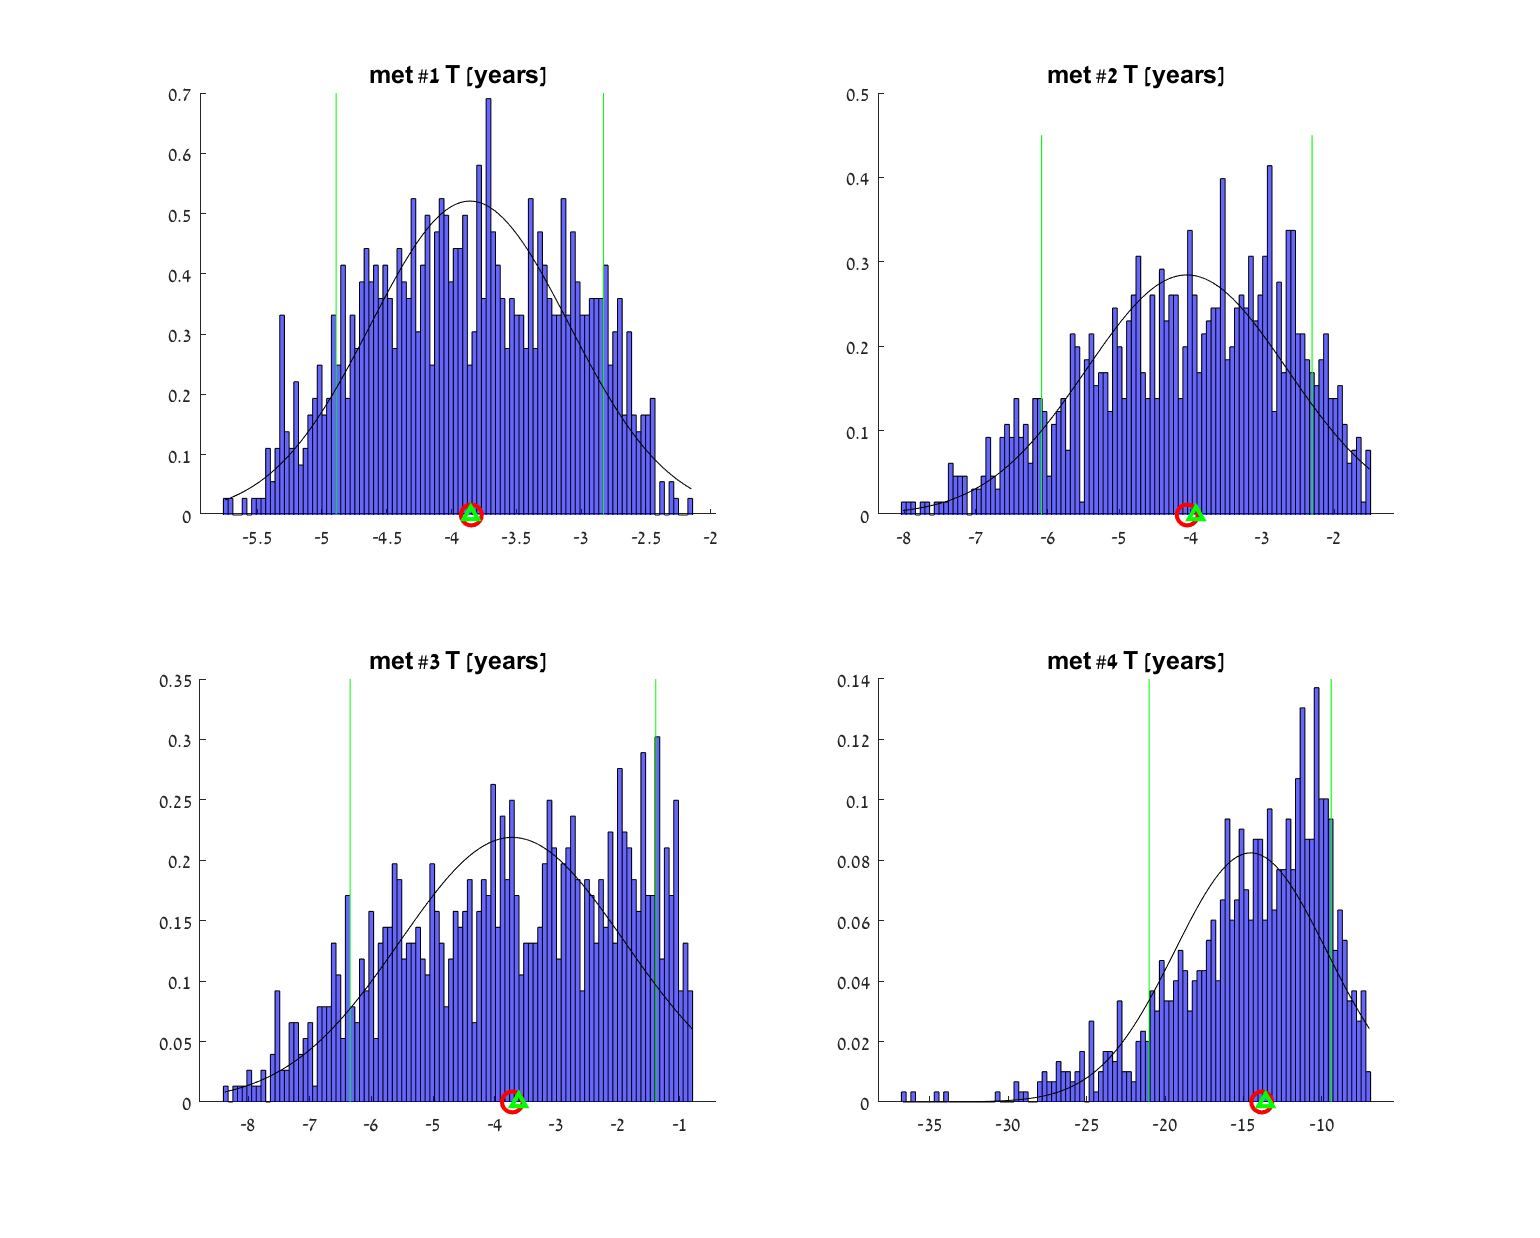
***

***Figure S4: Exponential model - Sensitivity analysis of the fit. Blue bars: A histogram of metastasis onset time () values, calculated from values of model parameters that were fitted to a 1000 random measurement samples within the measured data error bars. Black curve: A PDF plot assuming normal distribution of the values. Green triangle: Median value. Green vertical lines: interdecile range (10% and 90% of the sorted values). Red circle: The value resulting from fit to the reported measured data.***

***
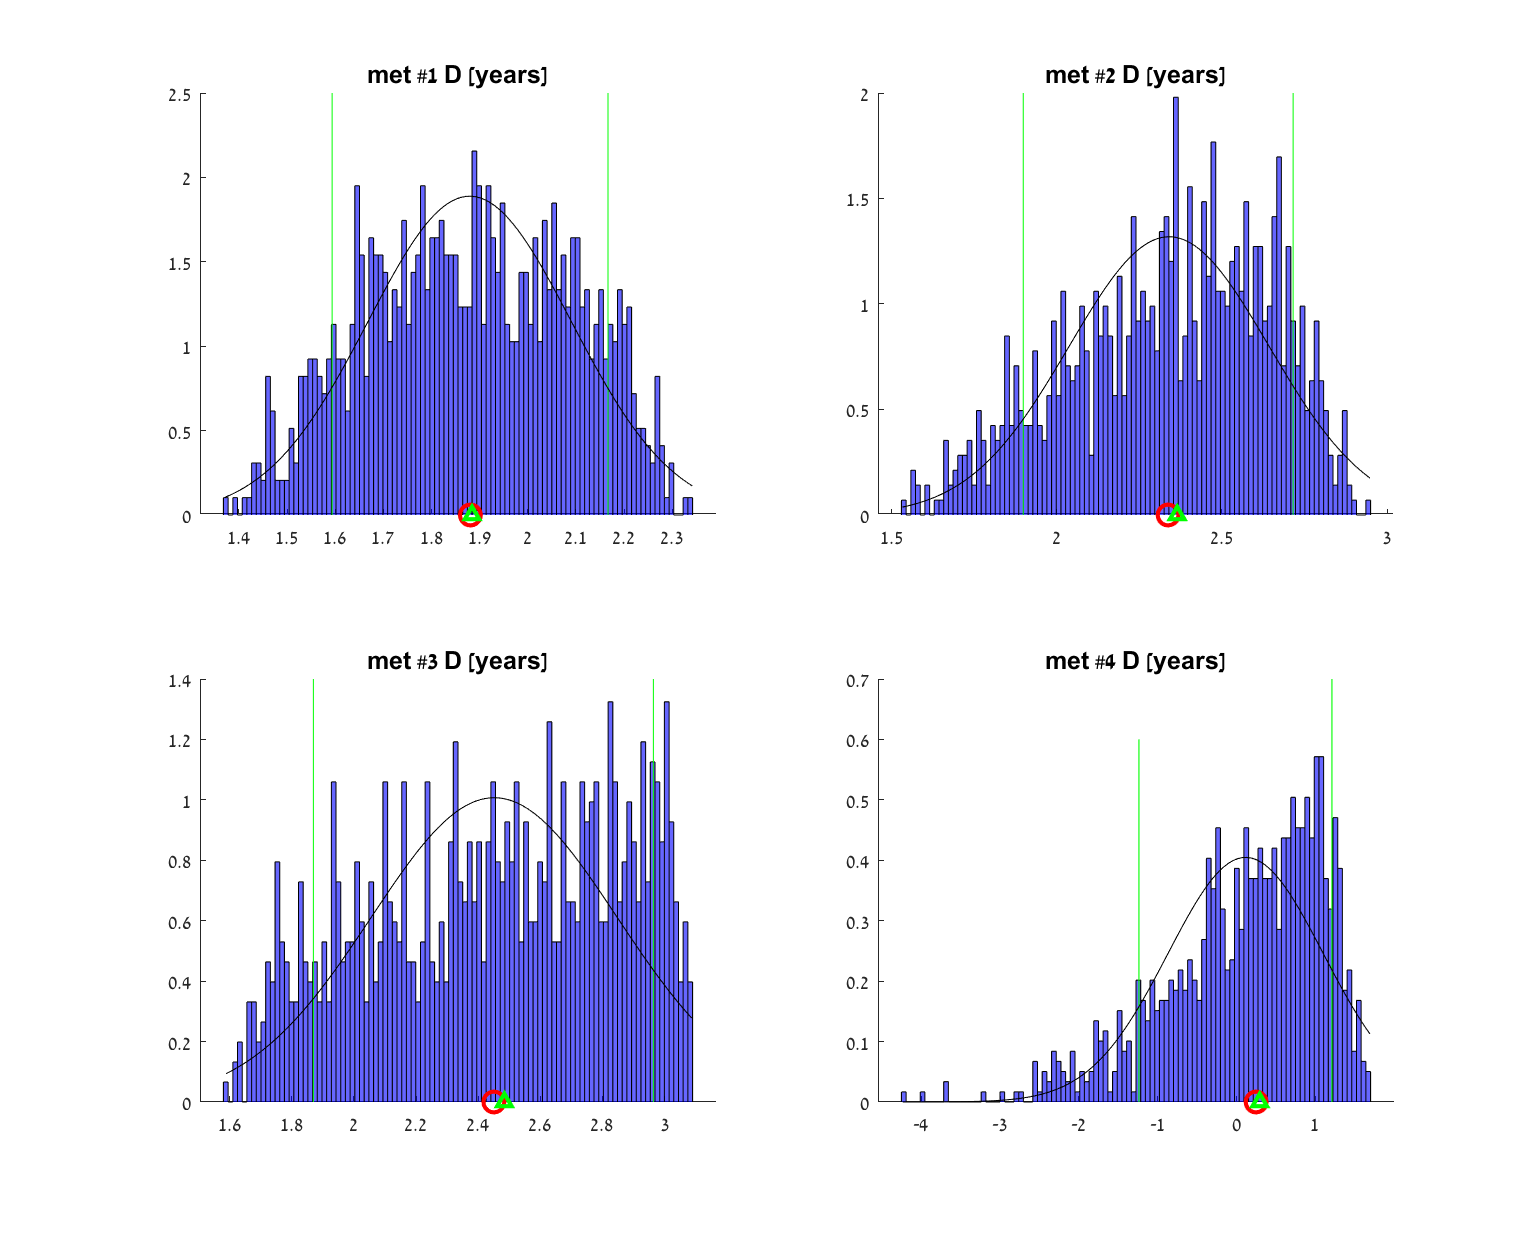
***

***Figure S5: Exponential model - Sensitivity analysis of the fit. Blue bars: A histogram of earliest possible detection time () values, calculated from values of model parameters that were fitted to a 1000 random measurement samples within the measured data error bars. Black curve: A PDF plot assuming normal distribution of the values. Green triangle: Median value. Green vertical lines: interdecile range (10% and 90% of the sorted values). Red circle: The value resulting from fit to the reported measured data.***

***
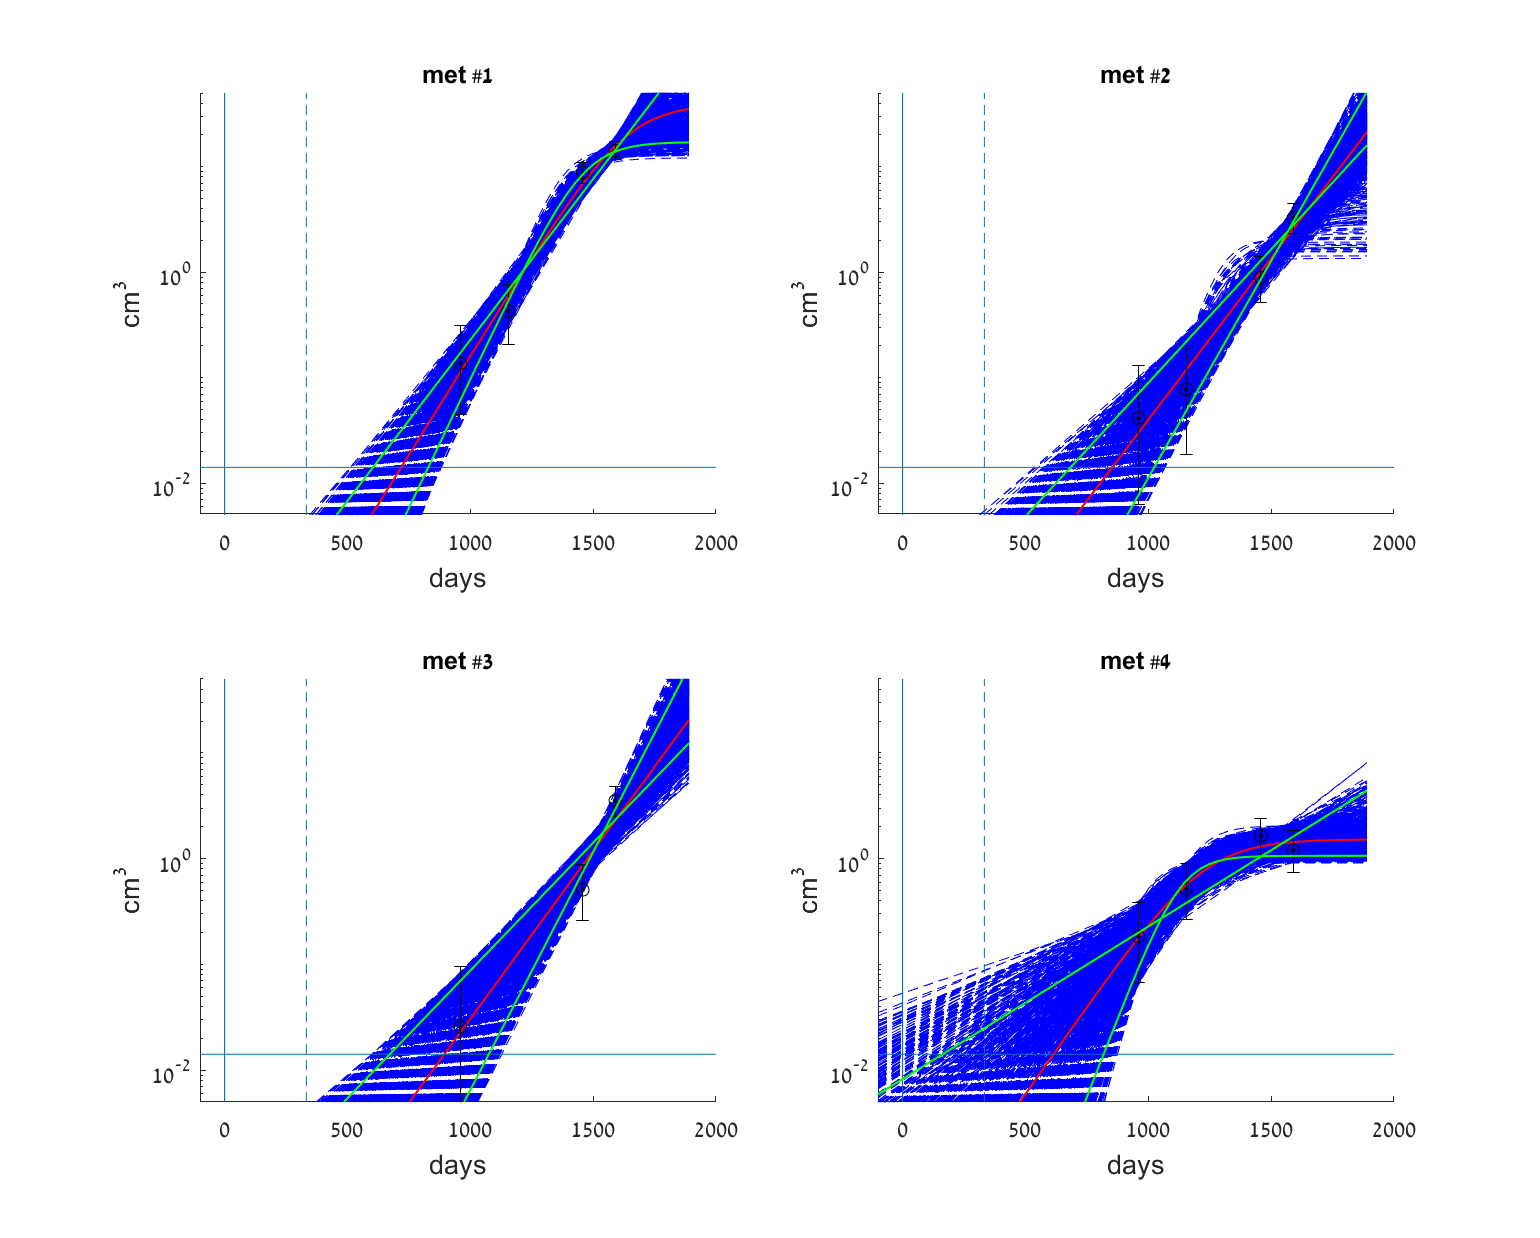
***

***Figure S6: Logistic model - Sensitivity analysis of the fit. Blue dashed lines: logistic models, fitted to a 1000 random different measurement samples within the measured data error bars. Black circles: Clinical data measurements with measurement error bars. Red curve: The model fitted to the reported measurement data. Green curves: interdecile range (fitted models with 10% and 90% of the sorted values).***


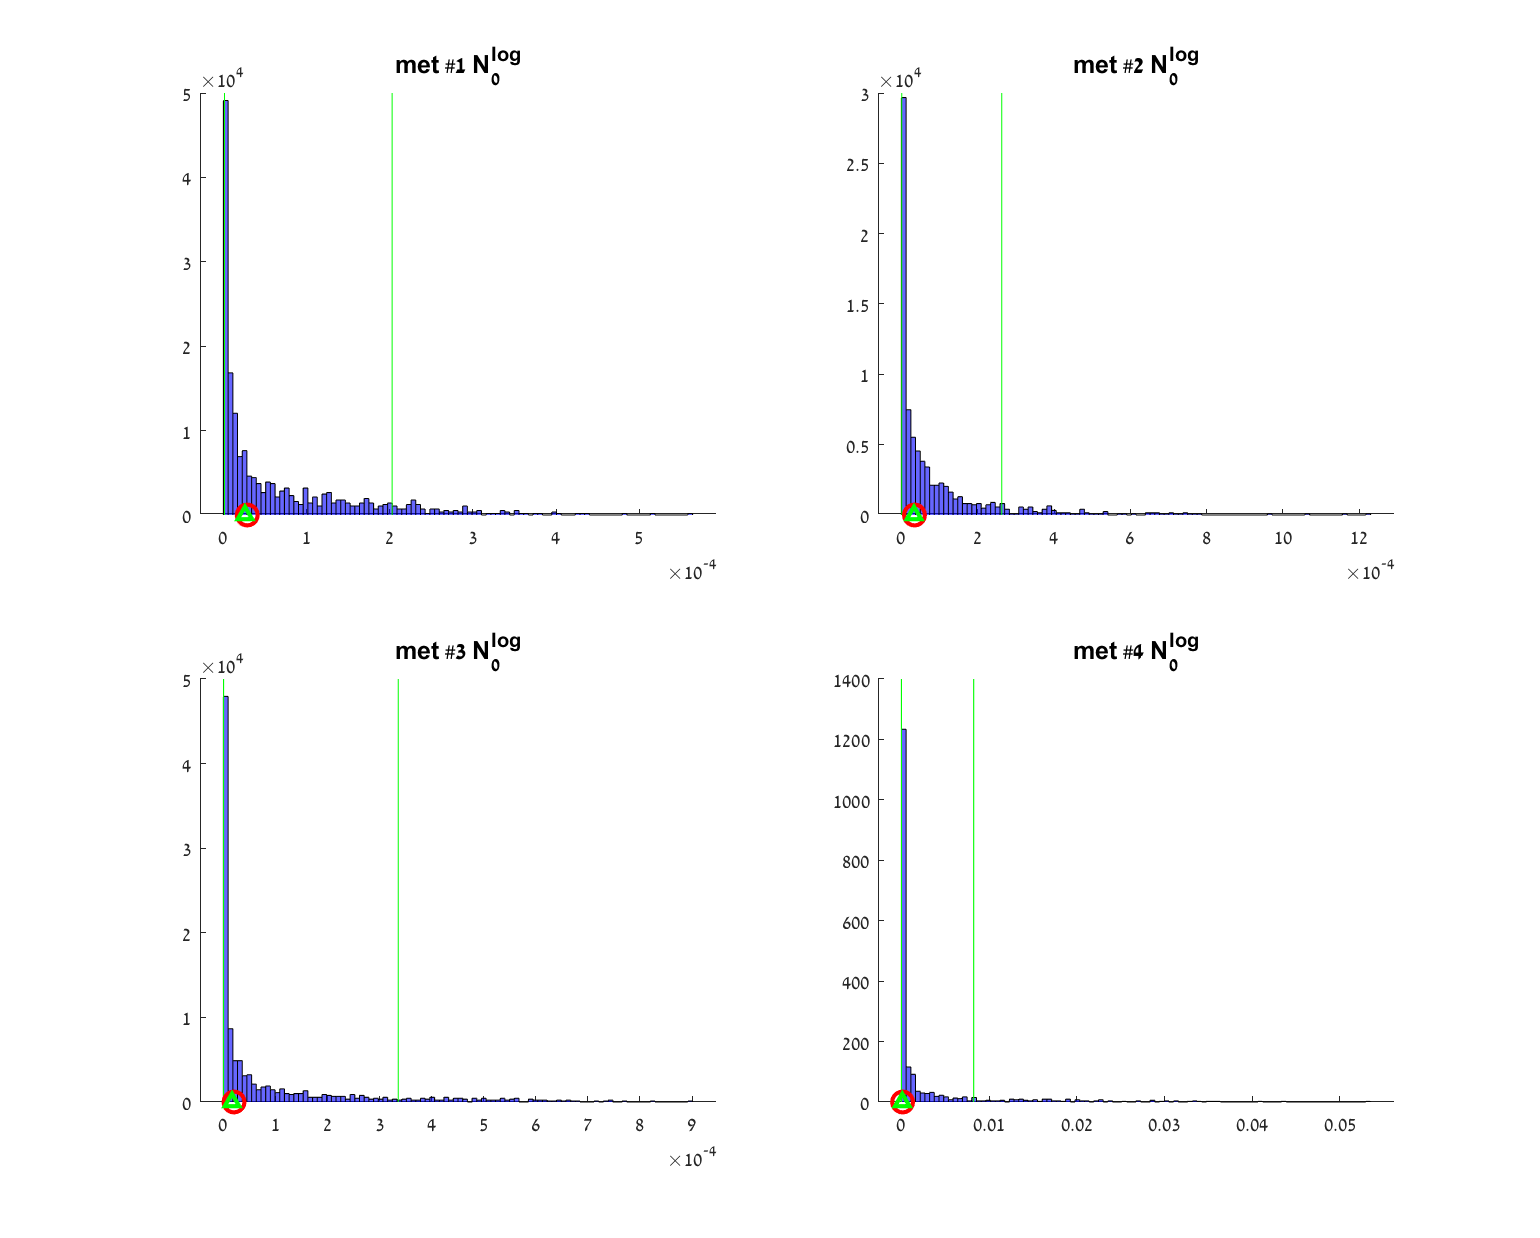


***Figure S7: Logistic model - Sensitivity analysis of the fit. Blue bars: A histogram of parameter values, fitted to a 1000 random measurement samples within the measured data error bars. Green triangle: Median value. Green vertical lines: interdecile range (10% and 90% of the sorted values). Red circle: The value fitted to the reported measured data.***

***
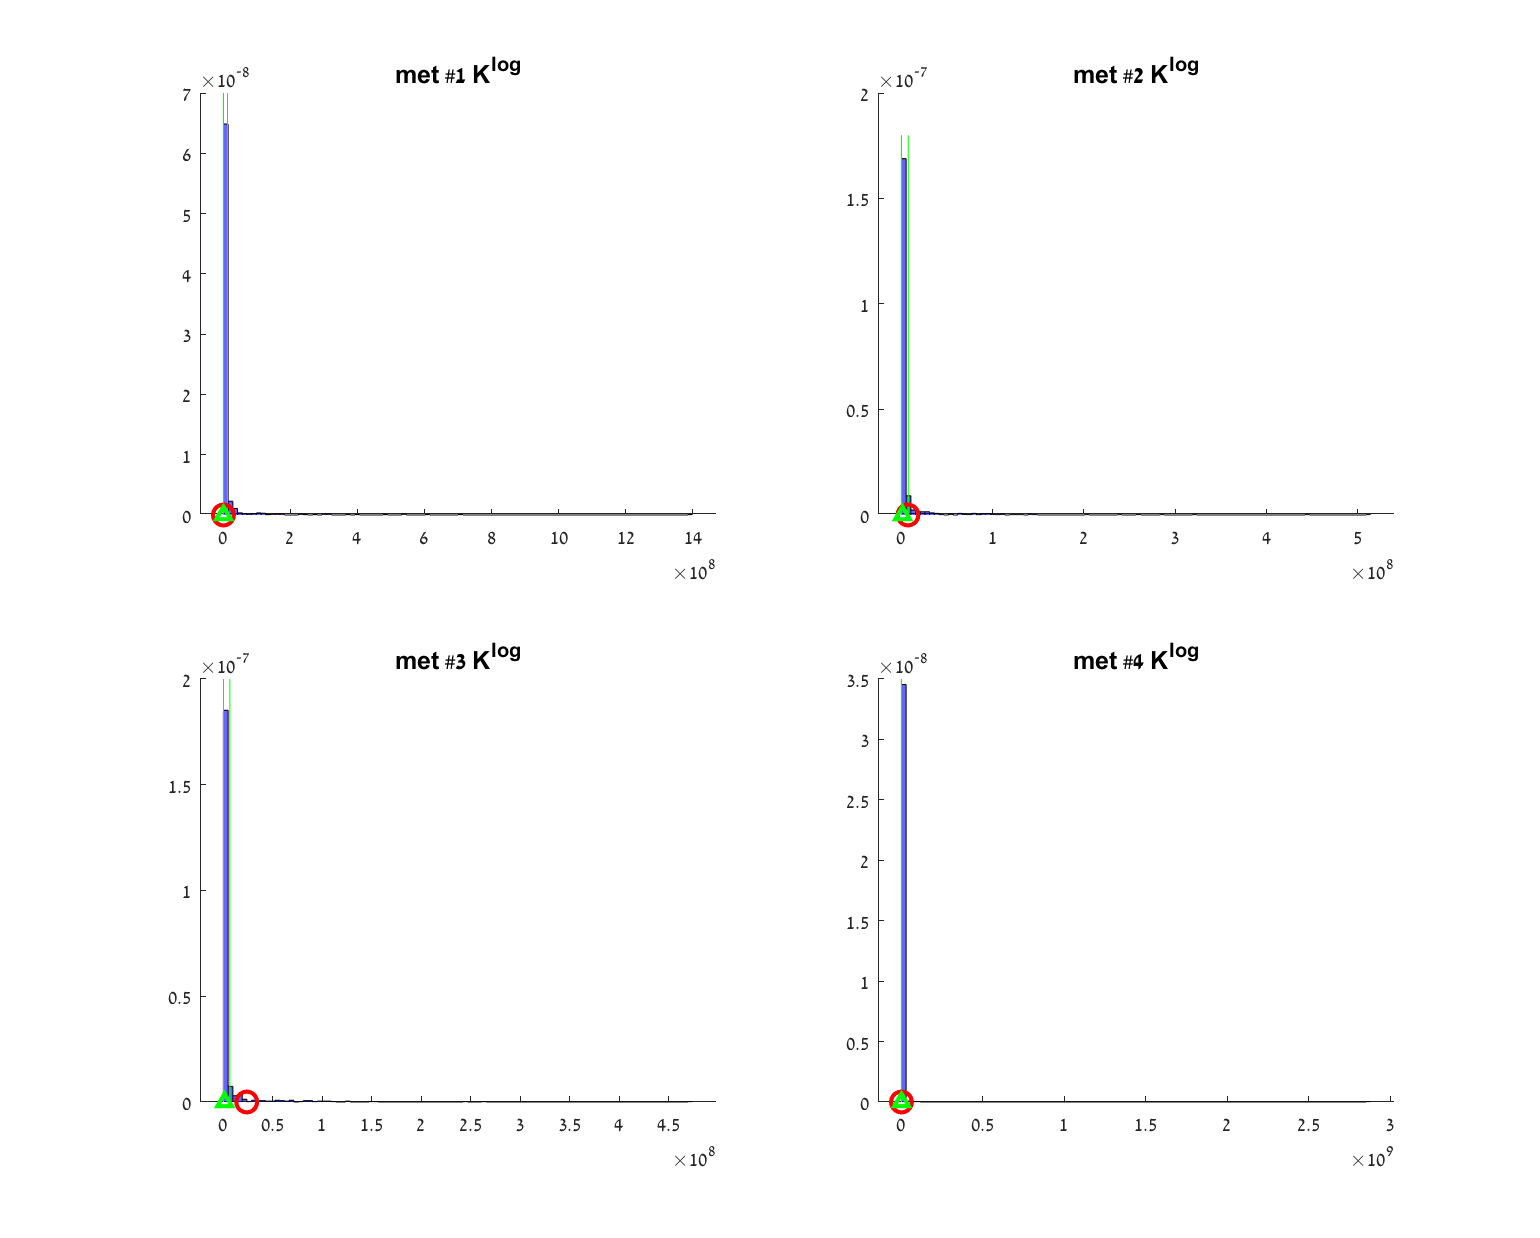
***

***Figure S8: Logistic model - Sensitivity analysis of the fit. Blue bars: A histogram of parameter values, fitted to a 1000 random measurement samples within the measured data error bars. Green triangle: Median value. Green vertical lines: interdecile range (10% and 90% of the sorted values). Red circle: The value fitted to the reported measured data.***

***
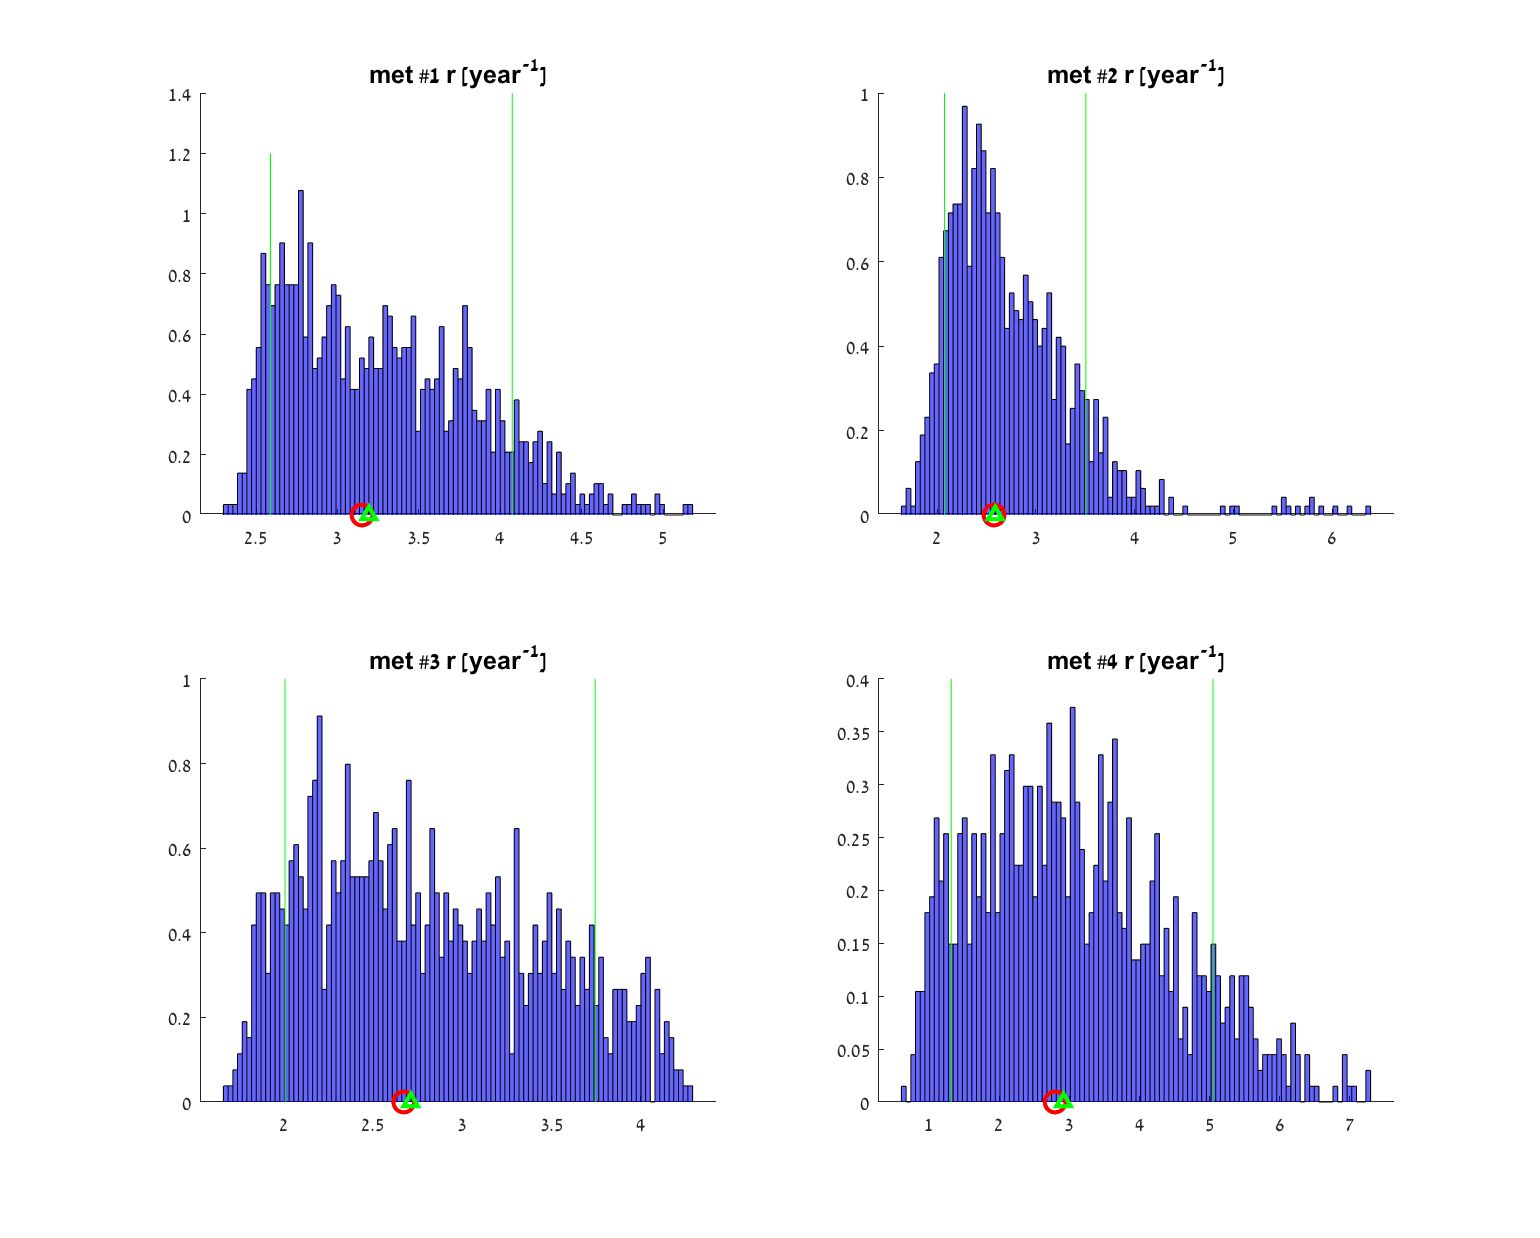
***

***Figure S9: Logistic model - Sensitivity analysis of the fit. Blue bars: A histogram of parameter values, fitted to a 1000 random measurement samples within the measured data error bars. Green triangle: Median value. Green vertical lines: interdecile range (10% and 90% of the sorted values). Red circle: The value fitted to the reported measured data.***

***
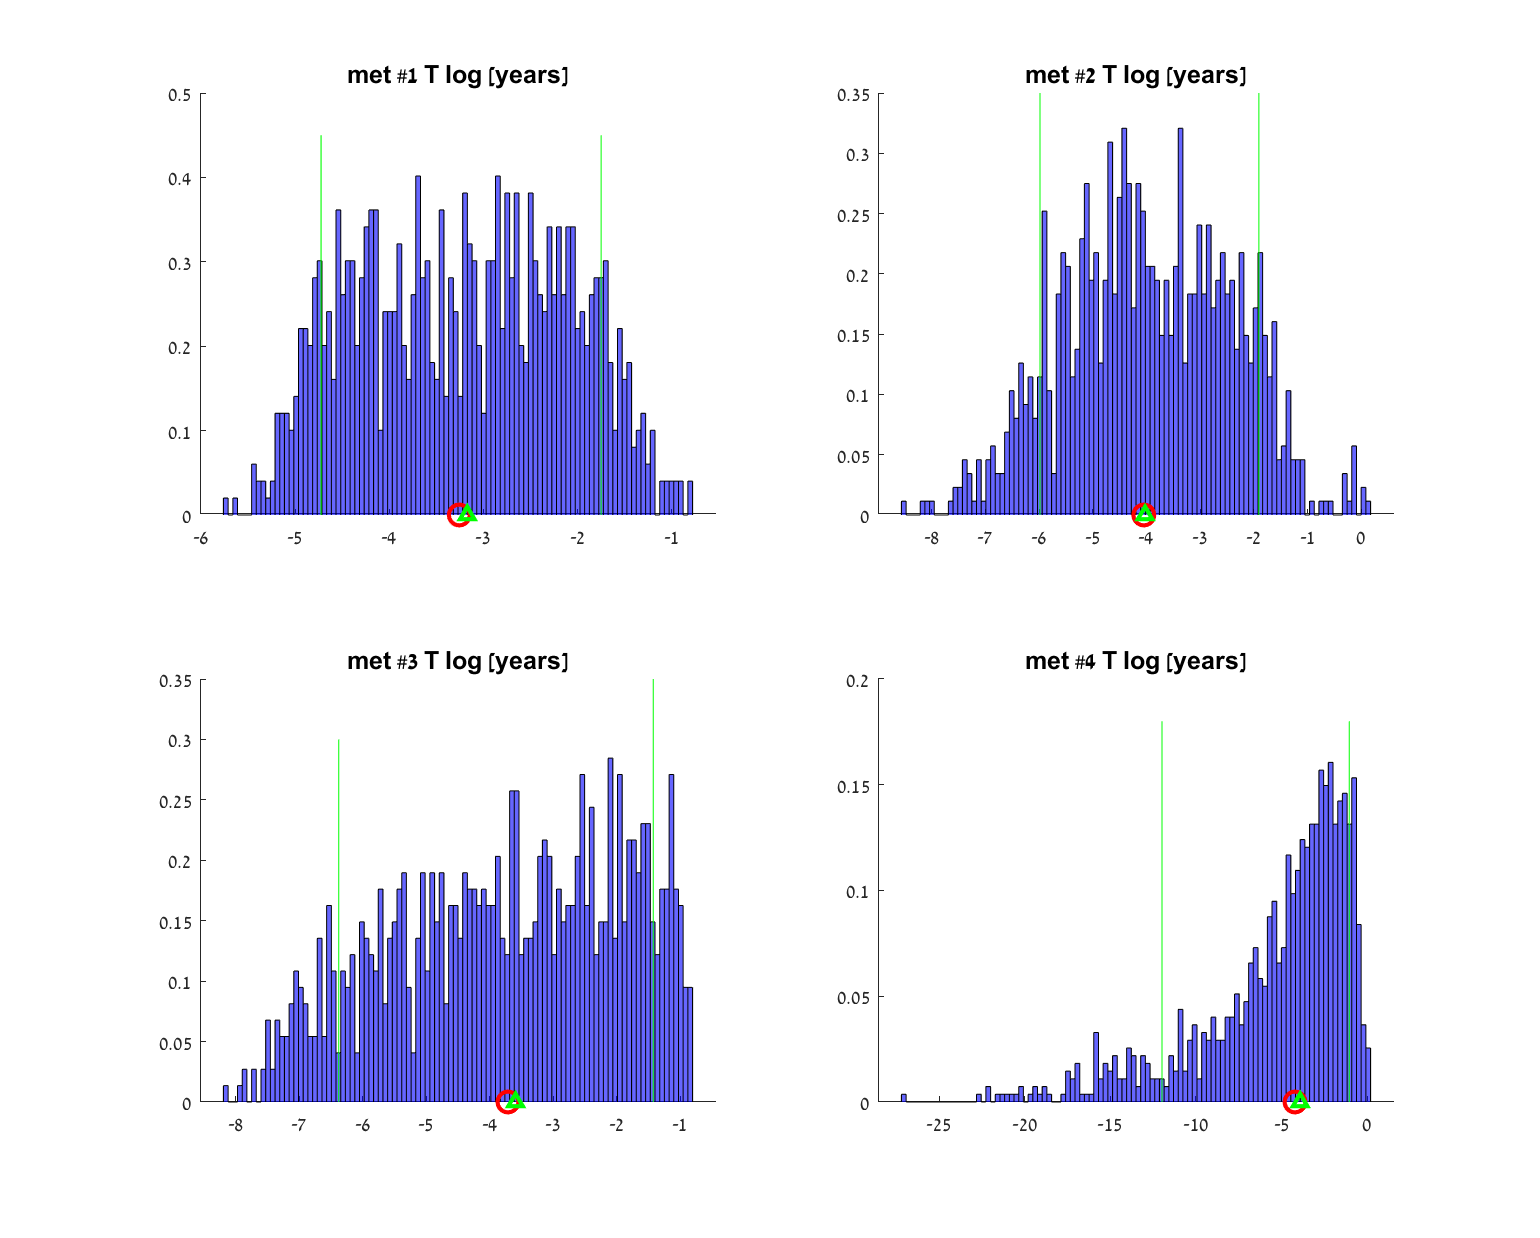
***

***Figure S10: Logistic model - Sensitivity analysis of the fit. Blue bars: A histogram of metastasis onset time () values, calculated from values of model parameters that were fitted to a 1000 random measurement samples within the measured data error bars. Green triangle: Median value. Green vertical lines: interdecile range (10% and 90% of the sorted values). Red circle: The value resulting from fit to the reported measured data.***

***
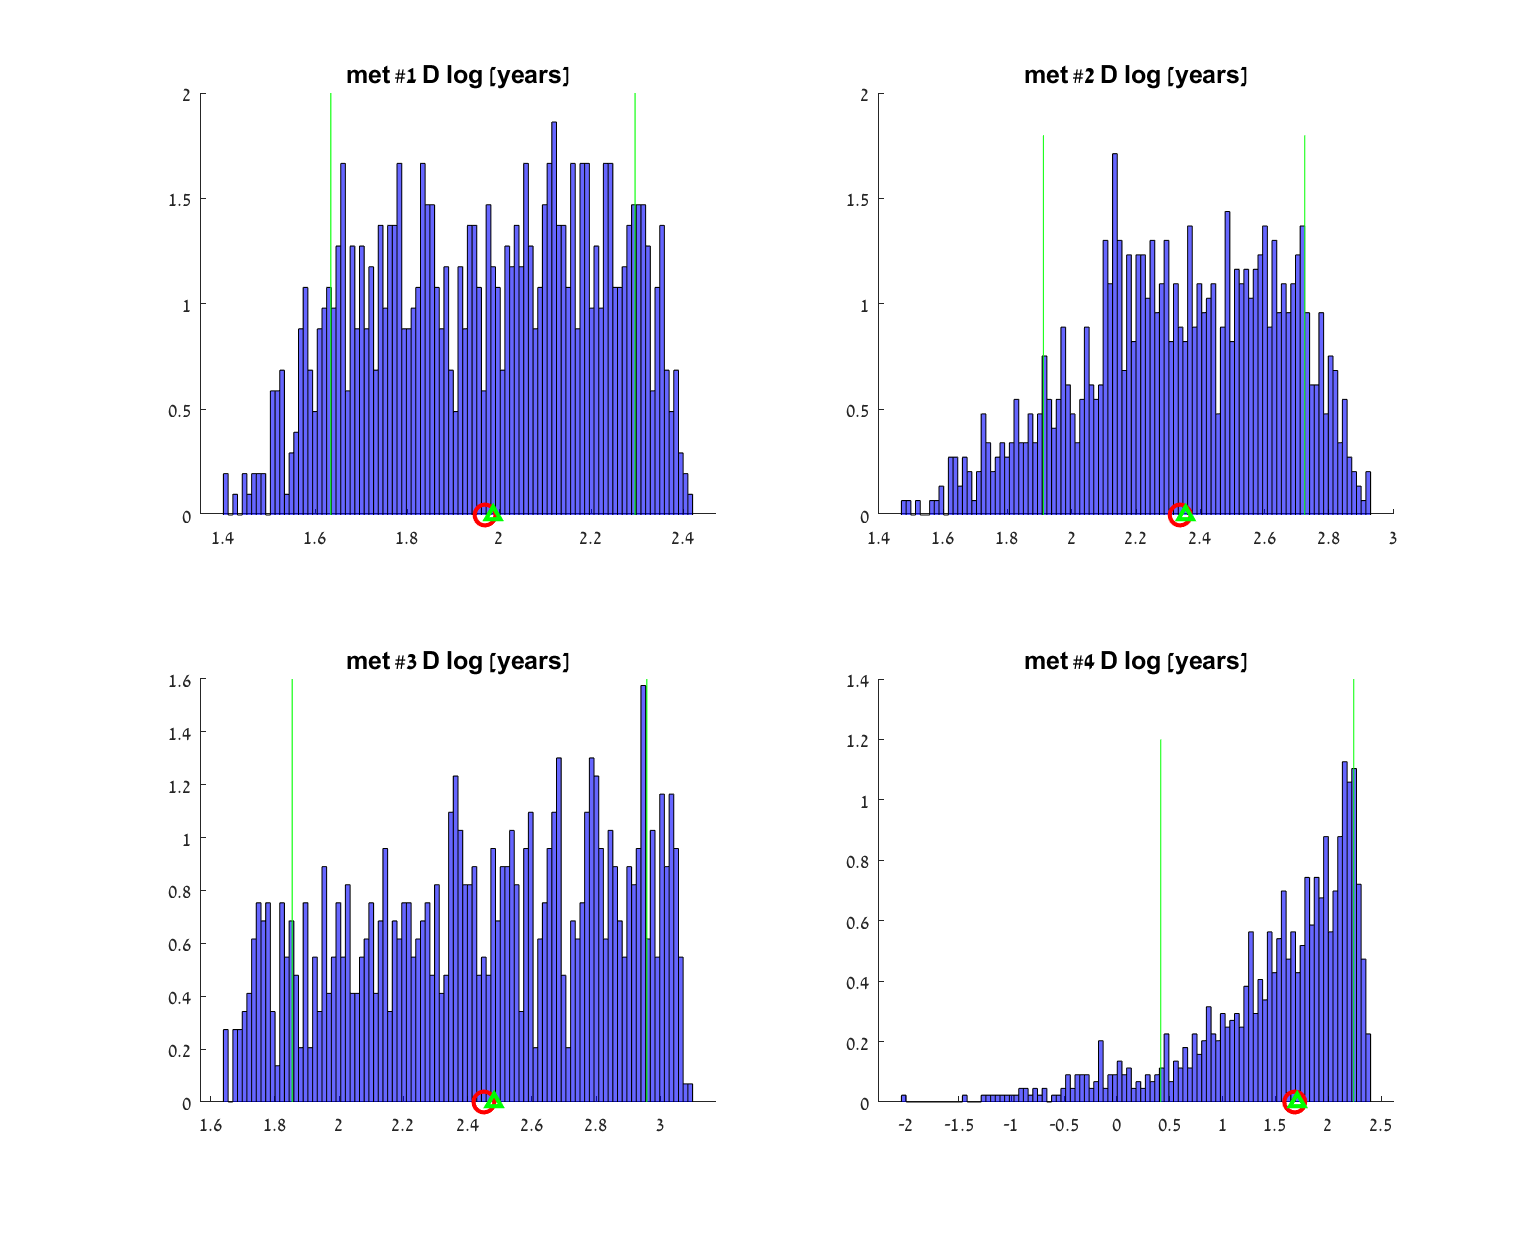
***

***Figure S11: Logistic model - Sensitivity analysis of the fit. Blue bars: A histogram of earliest possible detection time () values, calculated from values of model parameters that were fitted to a 1000 random measurement samples within the measured data error bars. Green triangle: Median value. Green vertical lines: interdecile range (10% and 90% of the sorted values). Red circle: The value resulting from fit to the reported measured data.***


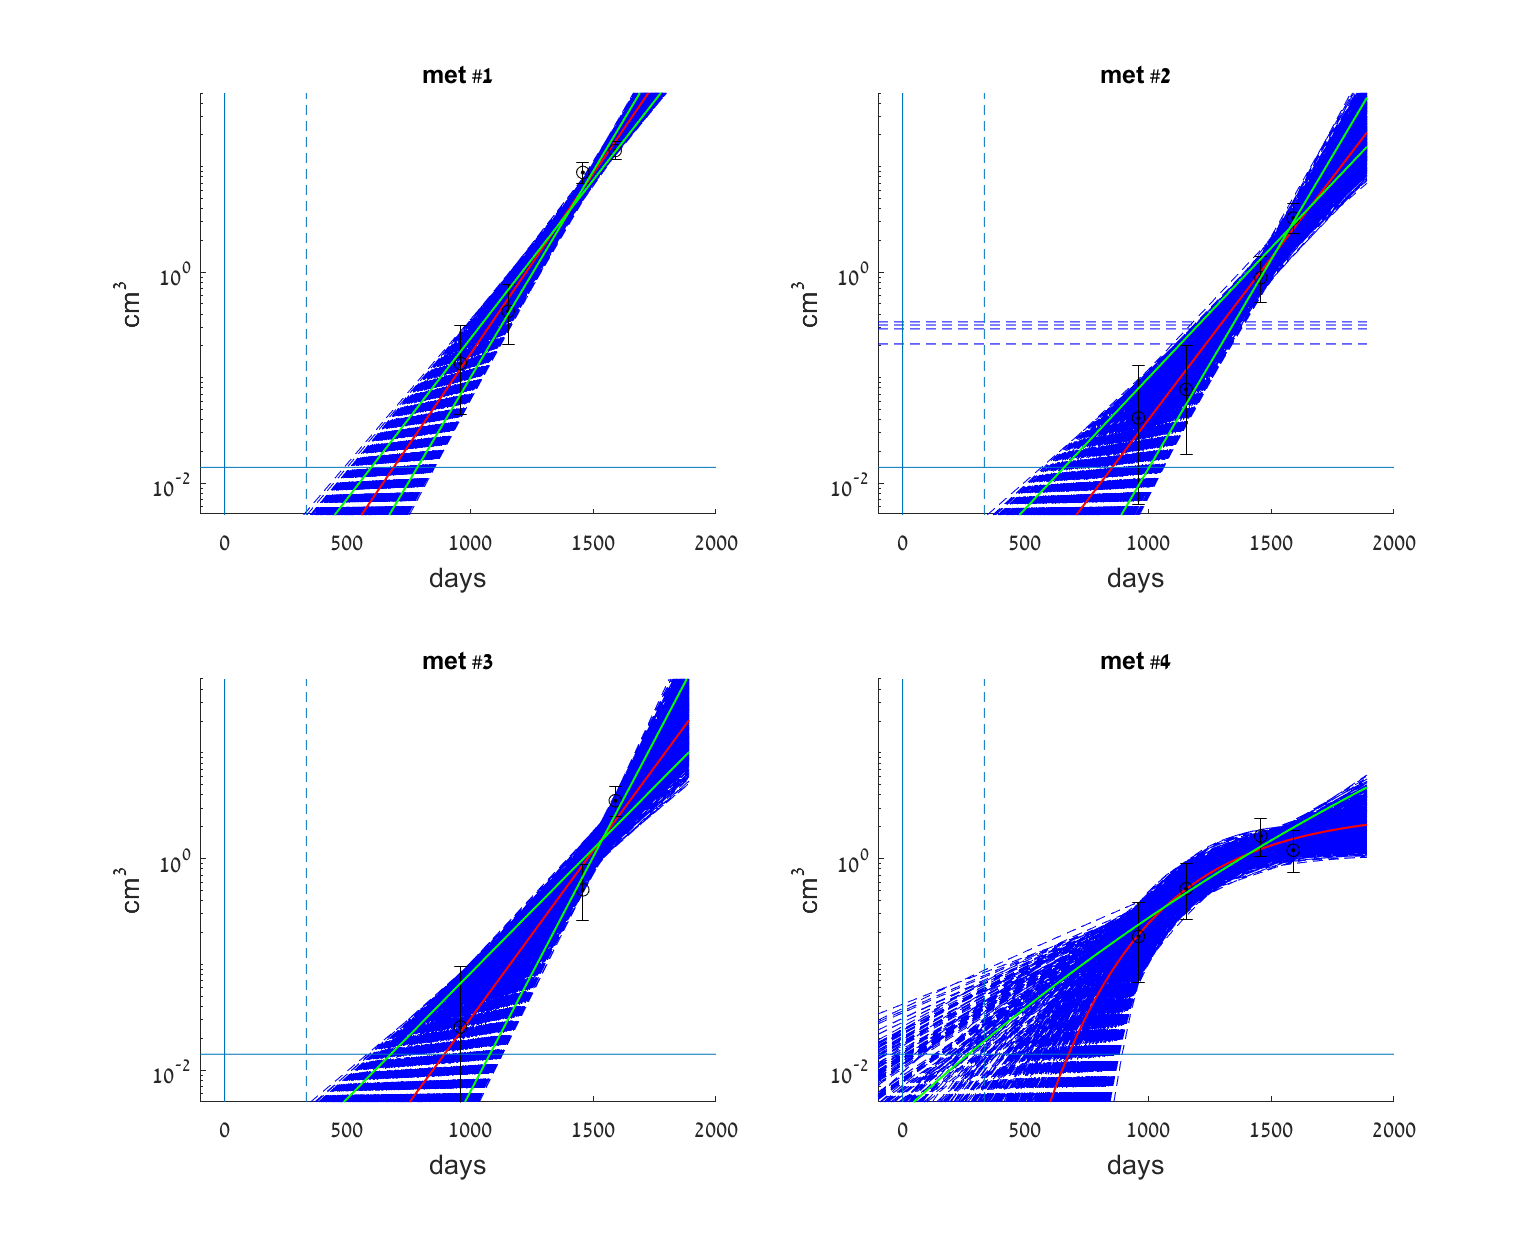


***Figure S12: Gompertz model – Sensitivity analysis of the fit. Blue dashed lines: Gompertz models, fitted to a 1000 random different measurement samples within the measured data error bars. Black circles: Clinical data measurements with measurement error bars. Red curve: The model fitted to the reported measurement data. Green curves: interdecile range (fitted models with 10% and 90% of the sorted values).***


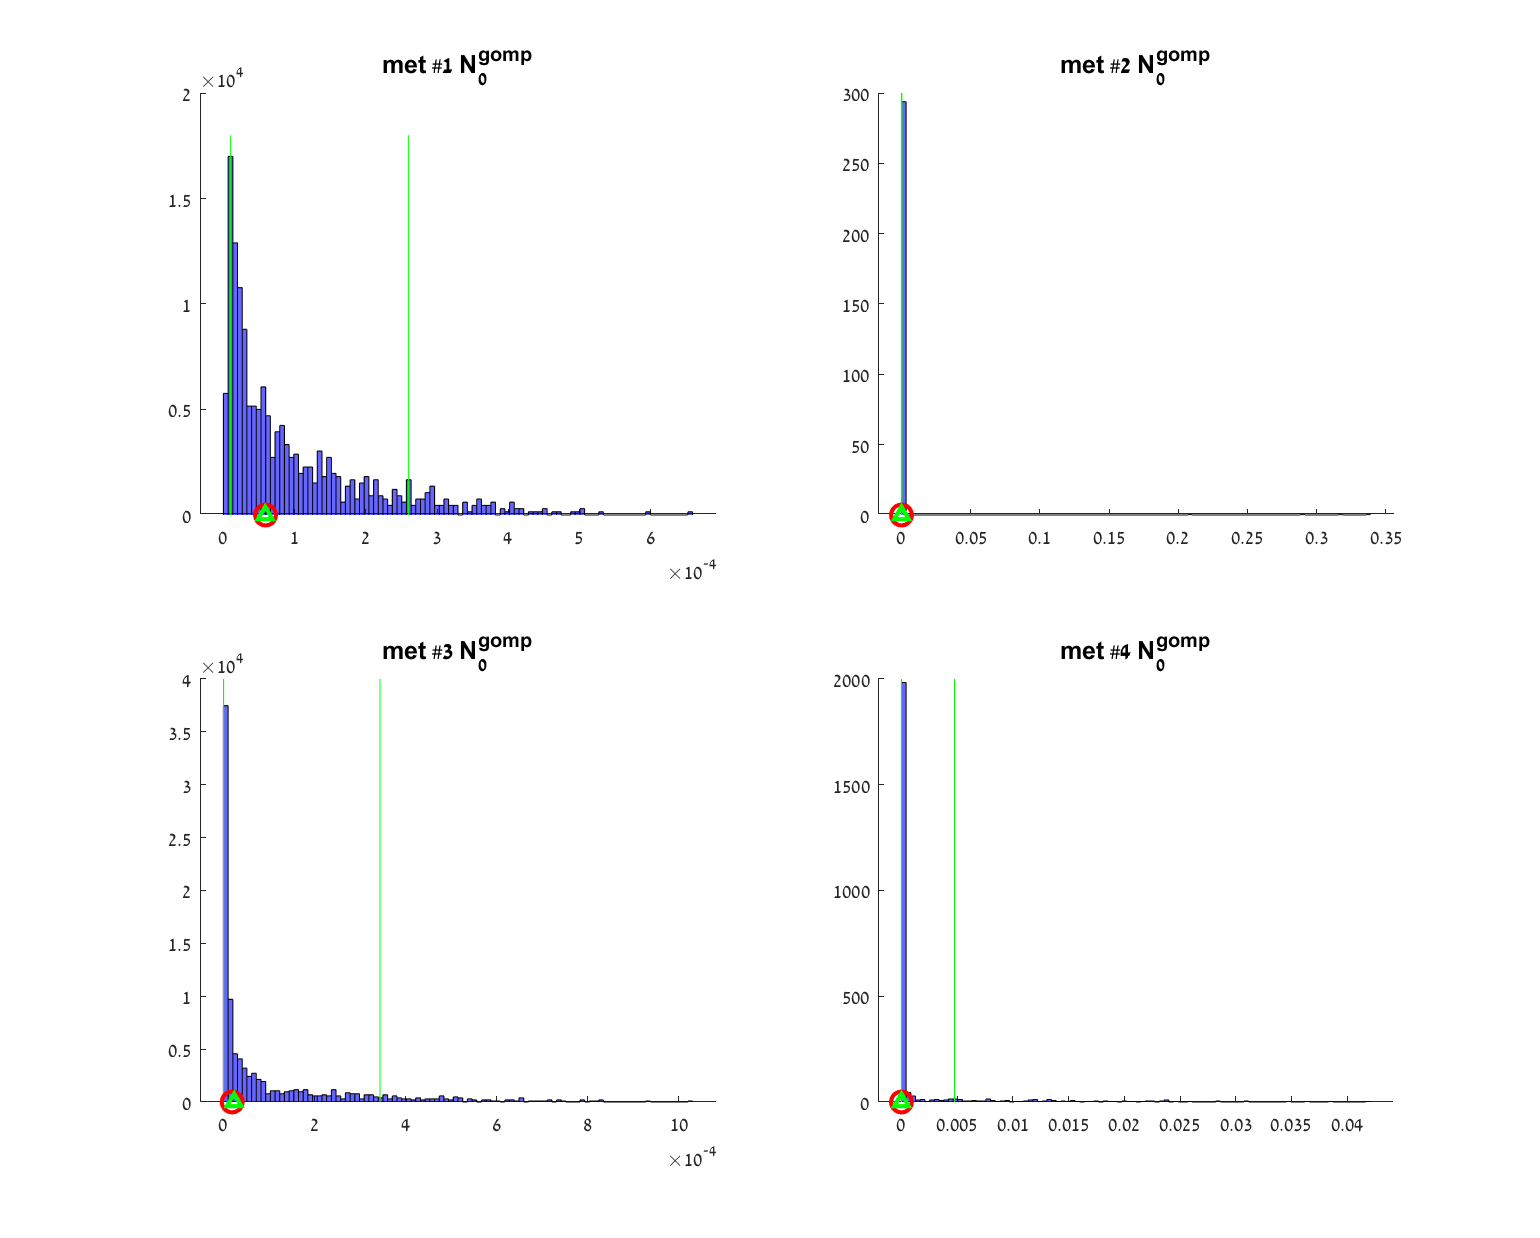


***Figure S13: Gompertz model - Sensitivity analysis of the fit. Blue bars: A histogram of parameter values, fitted to a 1000 random measurement samples within the measured data error bars. Green triangle: Median value. Green vertical lines: interdecile range (10% and 90% of the sorted values). Red circle: The value fitted to the reported measured data.***


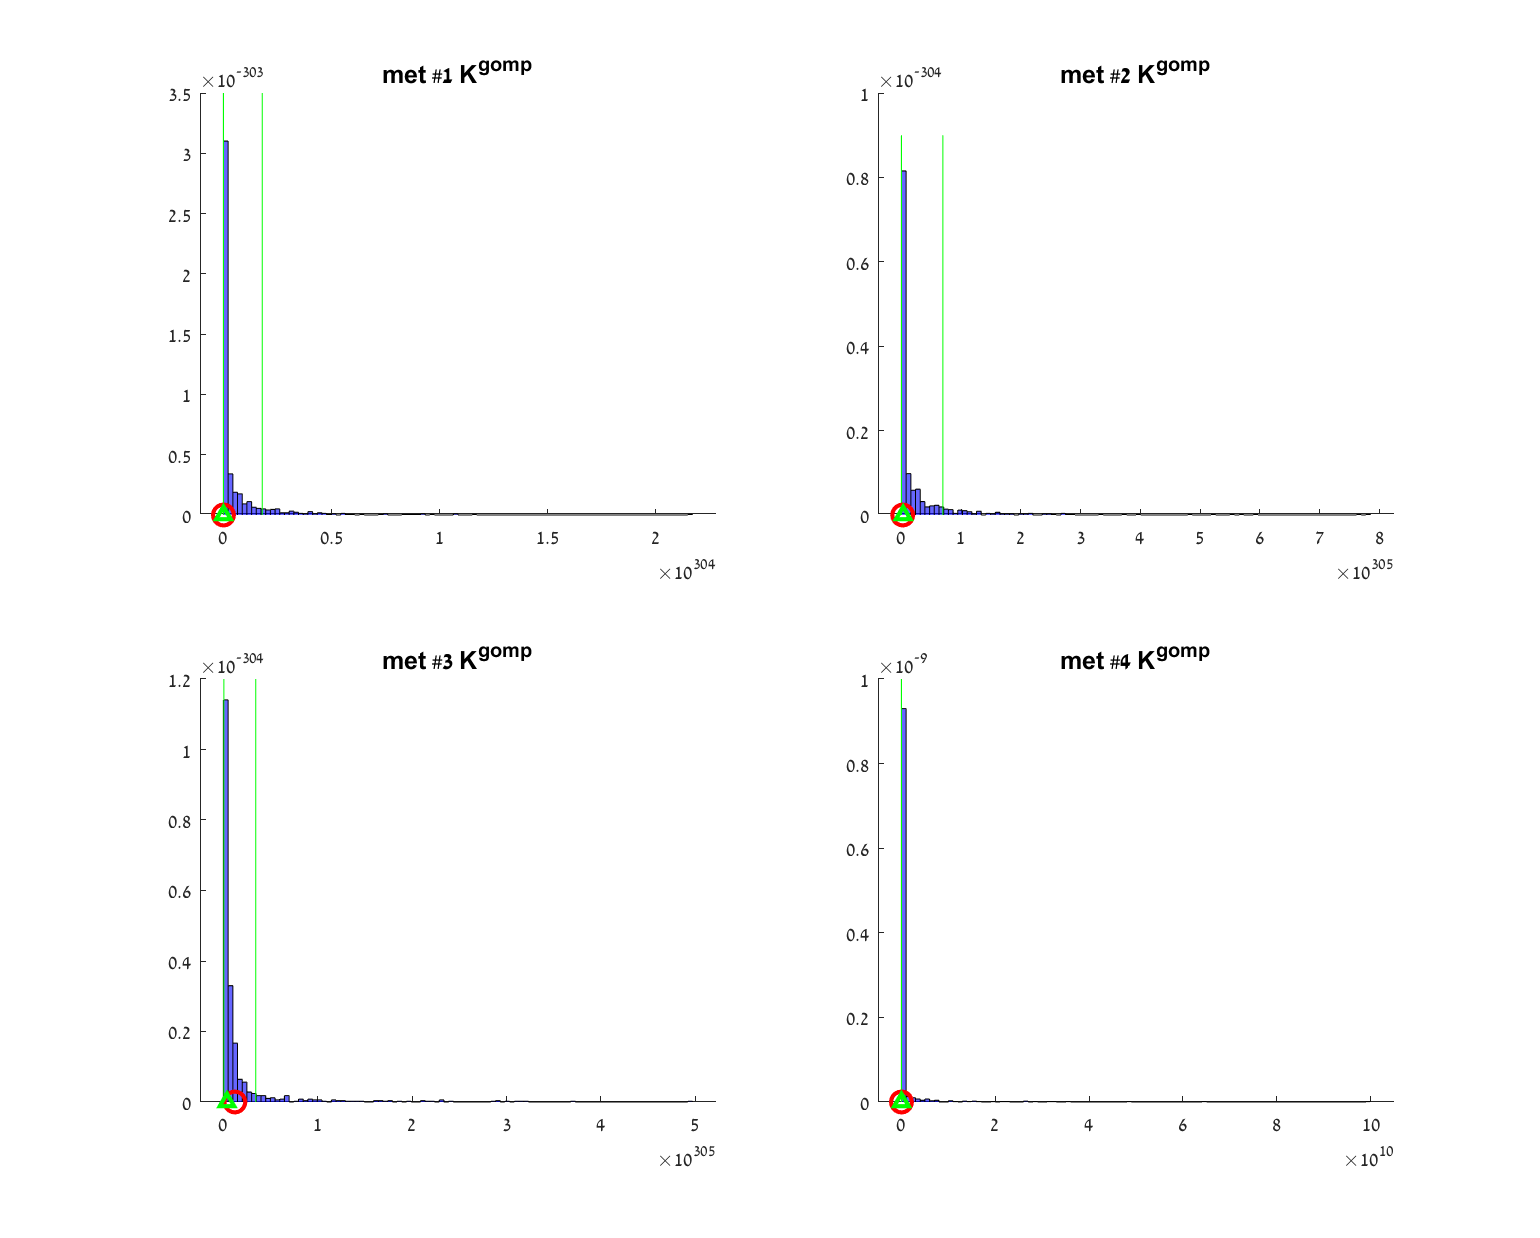


***Figure S14: Gompertz model - Sensitivity analysis of the fit. Blue bars: A histogram of parameter values, fitted to a 1000 random measurement samples within the measured data error bars. Green triangle: Median value. Green vertical lines: interdecile range (10% and 90% of the sorted values). Red circle: The value fitted to the reported measured data.***


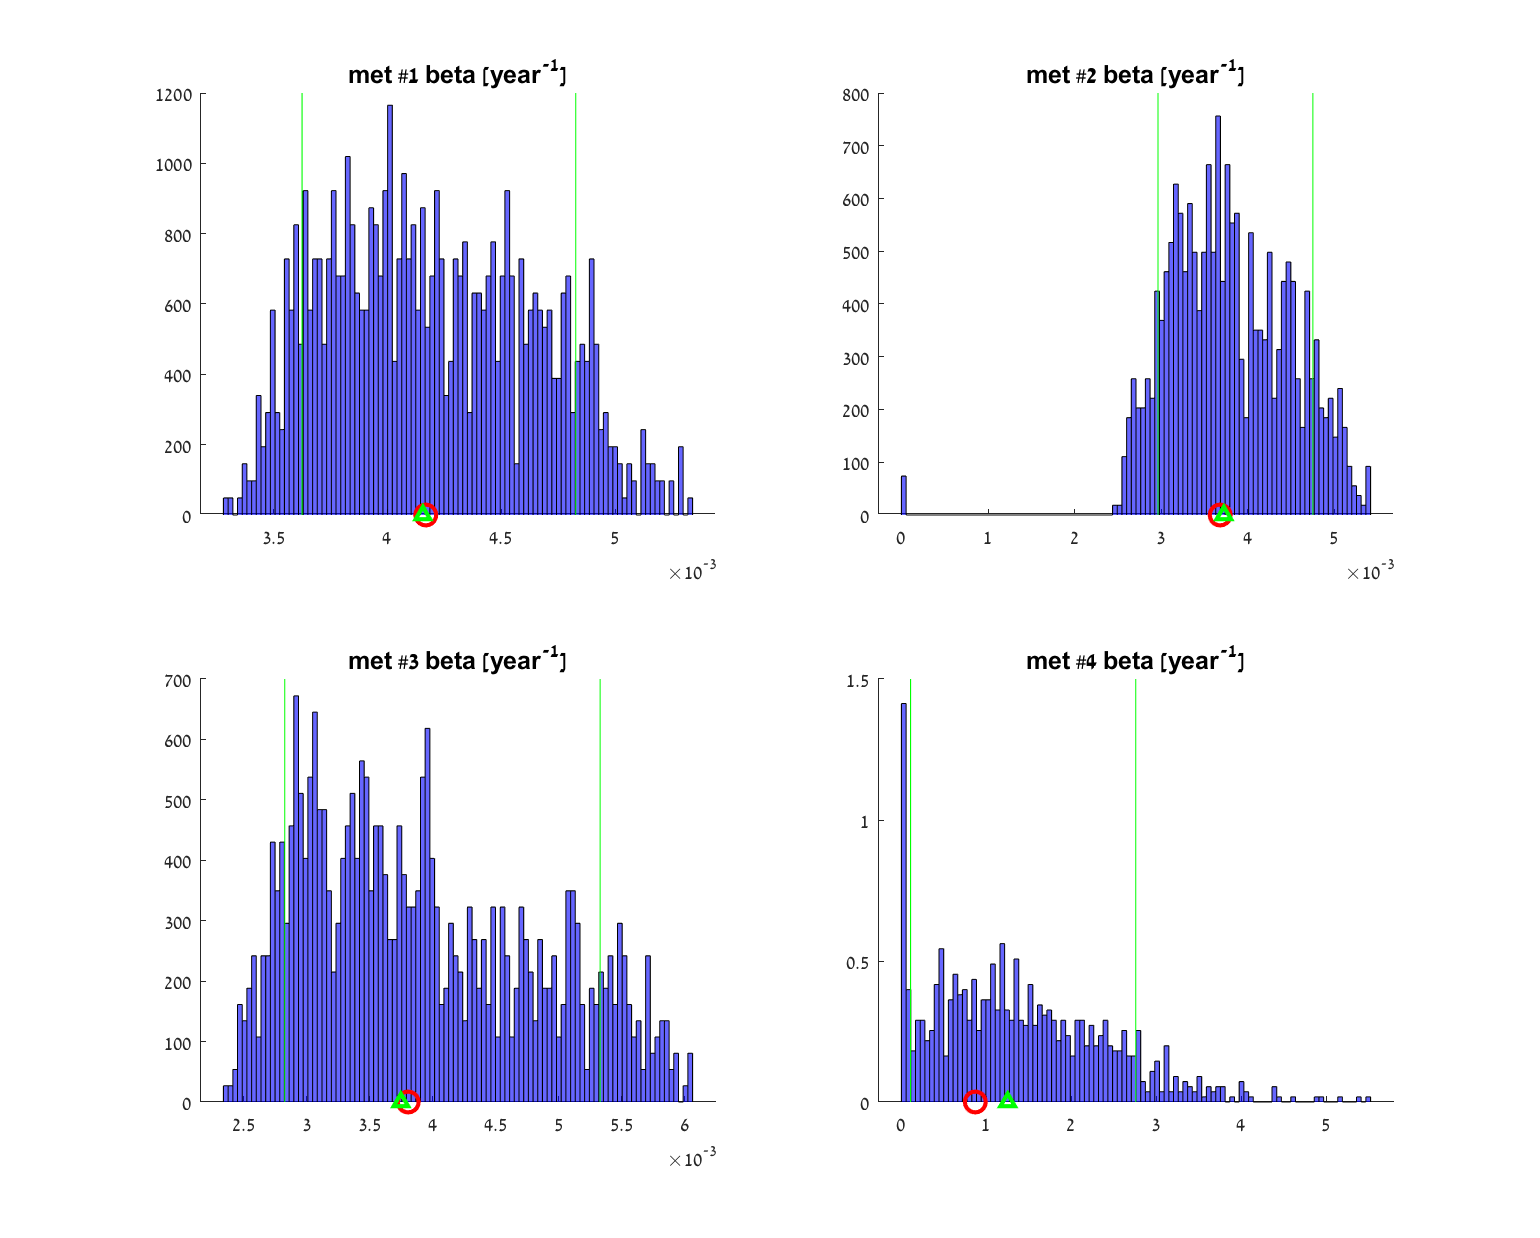


***Figure S15: Gompertz model - Sensitivity analysis of the fit. Blue bars: A histogram of parameter values, fitted to a 1000 random measurement samples within the measured data error bars. Green triangle: Median value. Green vertical lines: interdecile range (10% and 90% of the sorted values). Red circle: The value fitted to the reported measured data.***


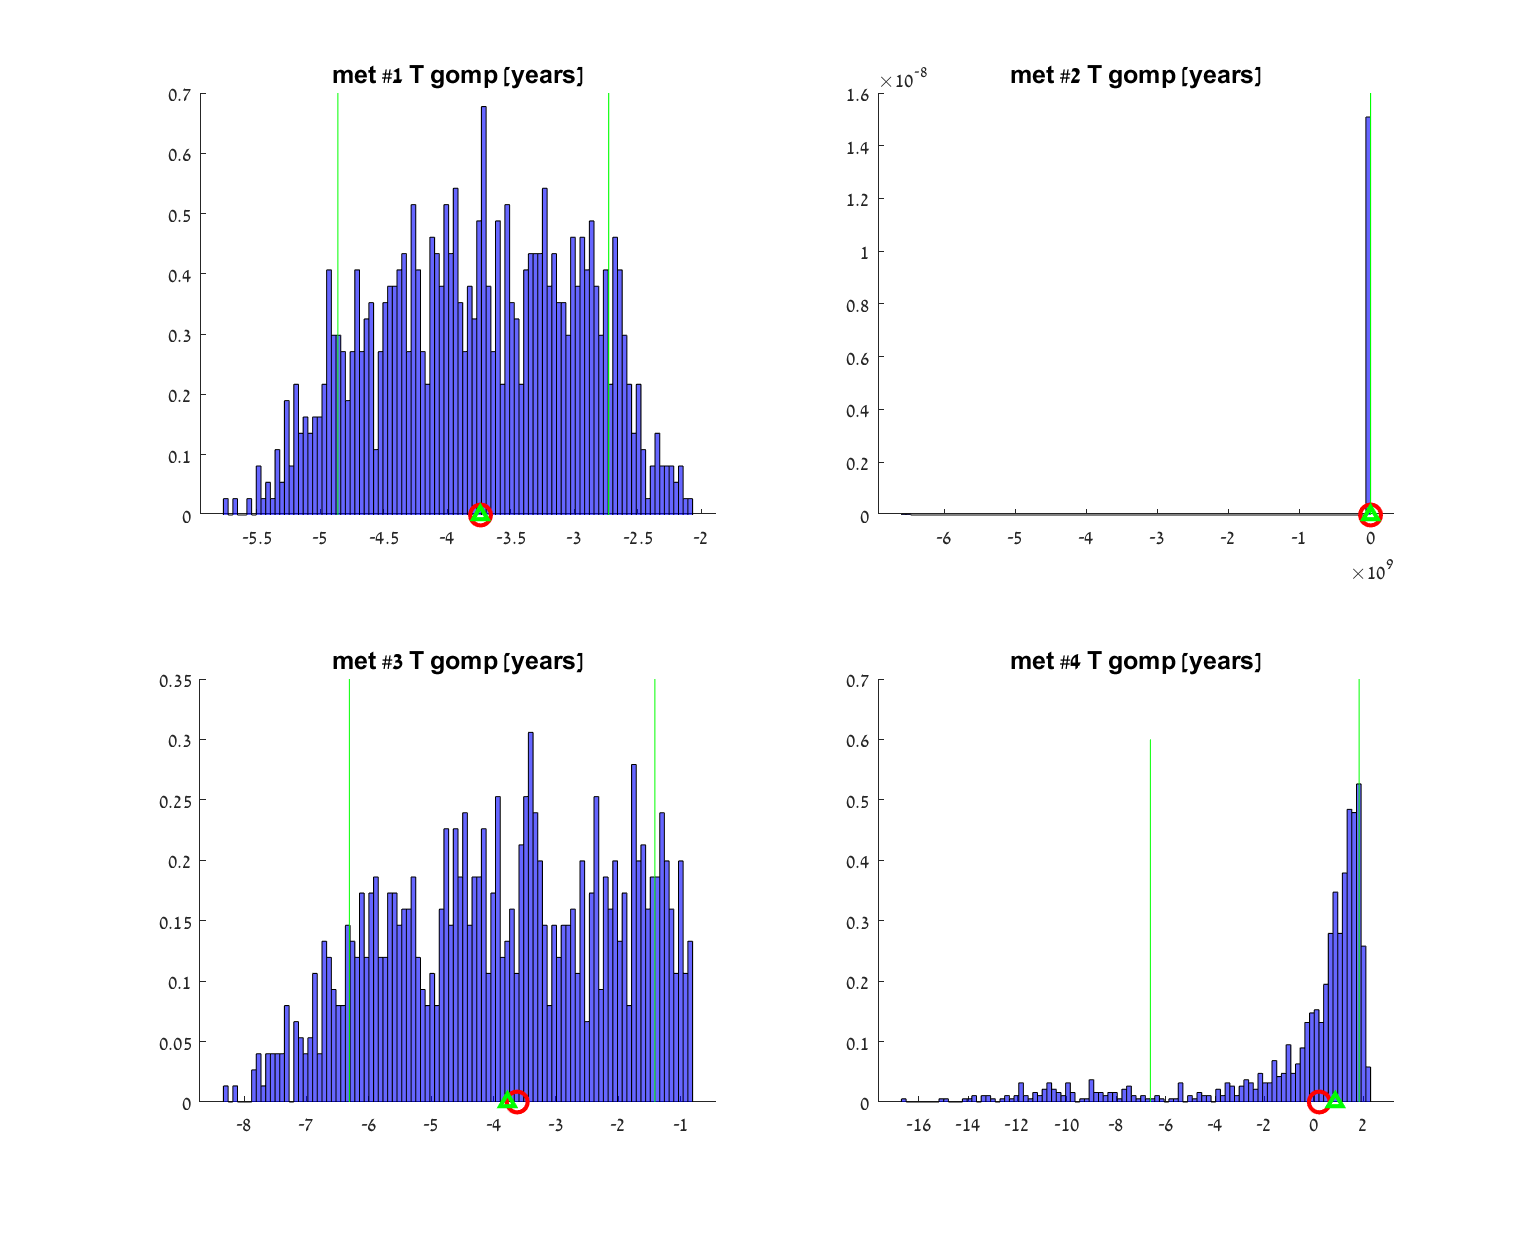


***Figure S16: Gompertz model - Sensitivity analysis of the fit. Blue bars: A histogram of metastasis onset time () values, calculated from values of model parameters that were fitted to a 1000 random measurement samples within the measured data error bars. Green triangle: Median value. Green vertical lines: interdecile range (10% and 90% of the sorted values). Red circle: The value resulting from fit to the reported measured data.***


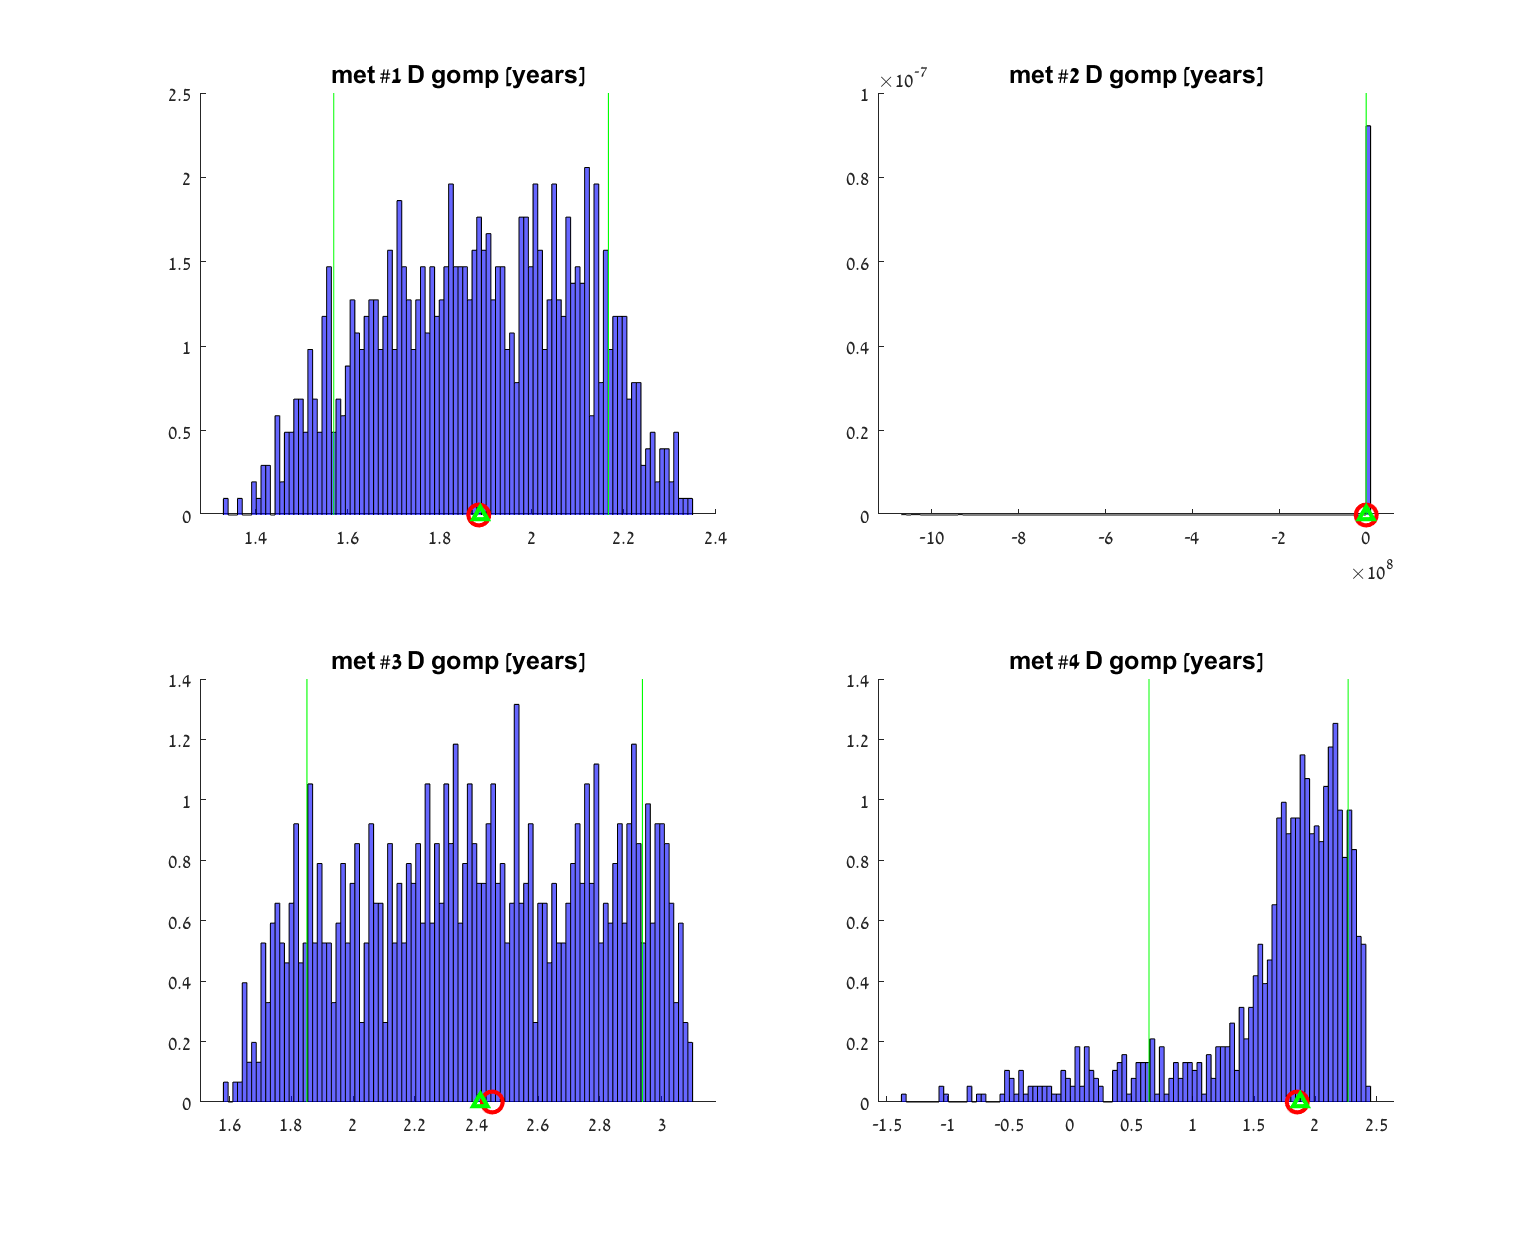


***Figure S17: Gompertz model - Sensitivity analysis of the fit. Blue bars: A histogram of earliest possible detection time () values, calculated from values of model parameters that were fitted to a 1000 random measurement samples within the measured data error bars. Green triangle: Median value. Green vertical lines: interdecile range (10% and 90% of the sorted values). Red circle: The value resulting from fit to the reported measured data.***
